# Supplementary material for: Fe2O3/rGO/CNT composite sulfur hosts with physical and chemical dual-encapsulation for high performance lithium–sulfur batteries
Source: Royal Society of Chemistry journal article supplement (doi:10.1039/d1nj03769b), 2021-01-01
Supplement: d1nj03769b1.pdf [file d1nj03769b1.pdf]

S is the main active material of cathode material in lithium-sulfur battery, so in the process of preparing cathode material, we all want to increase the content of sulfur, that is, less  $\text{Fe}_2\text{O}_3/\text{rGO}/\text{CNT}$  as much as possible. The effects of 40 wt%, 30 wt% and 20 wt%  $\text{Fe}_2\text{O}_3/\text{rGO}/\text{CNT}$  on electrochemical performance were tested, as shown in Fig. S1. With the increase of the proportion of  $\text{Fe}_2\text{O}_3/\text{rGO}/\text{CNT}$ , that is, the increase of S content, the specific capacity and cycle performance of the electrode materials decreased. This is mainly due to the fact that S is a non-conductor and the increase of S content leads to the decrease of conductivity, polarization and electrochemical properties of cathode materials.

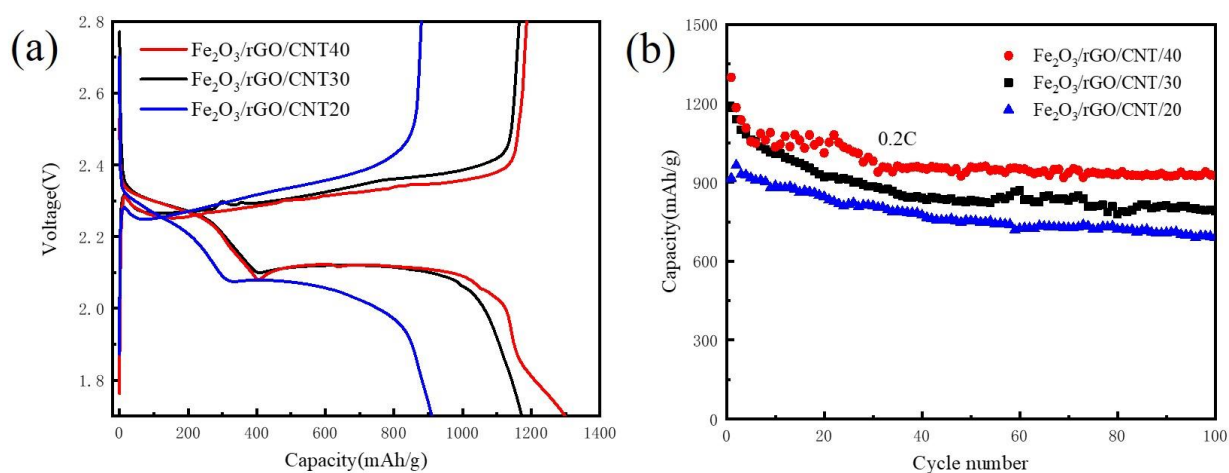

Fig. S1 Effect of  $\text{Fe}_2\text{O}_3/\text{rGO}/\text{CNT}$  ratio on the performance of the Li-S battery

In order to eliminate the influence of  $\text{Fe}_2\text{O}_3/\text{rGO}/\text{CNT}$  on the capacity of the system, the capacity of  $\text{Fe}_2\text{O}_3/\text{rGO}/\text{CNT}$  was tested separately, shown in Fig. S2. At 0.2C rate, the initial discharge capacity of  $\text{Fe}_2\text{O}_3/\text{rGO}/\text{CNT}$  is only  $\sim 190$  mAh/g, and the initial charge capacity is  $\sim 64$  mAh/g. After 100 cycles, the charge capacity is only  $\sim 22$  mAh/g, which is negligible for the capacity of cathode materials in this paper. The low capacity of  $\text{Fe}_2\text{O}_3/\text{rGO}/\text{CNT}$  is due to the voltage range of 1.7-2.8 V tested for lithium-sulfur batteries. Although the theoretical capacity of  $\text{Fe}_2\text{O}_3$  is  $\sim 1000$  mAh/g, but it is tested at the voltage range of 0-2V as the anode material of lithium-ion battery. At the same time, the electrolyte systems of lithium-sulfur battery and lithium-ion battery are also different. According to the synthesis process, the mass ratios of  $\text{Fe}_2\text{O}_3$ , rGO, CNT and S in  $\text{Fe}_2\text{O}_3/\text{rGO}/\text{CNT}$  are 6%, 17%, 17% and 60%, respectively.

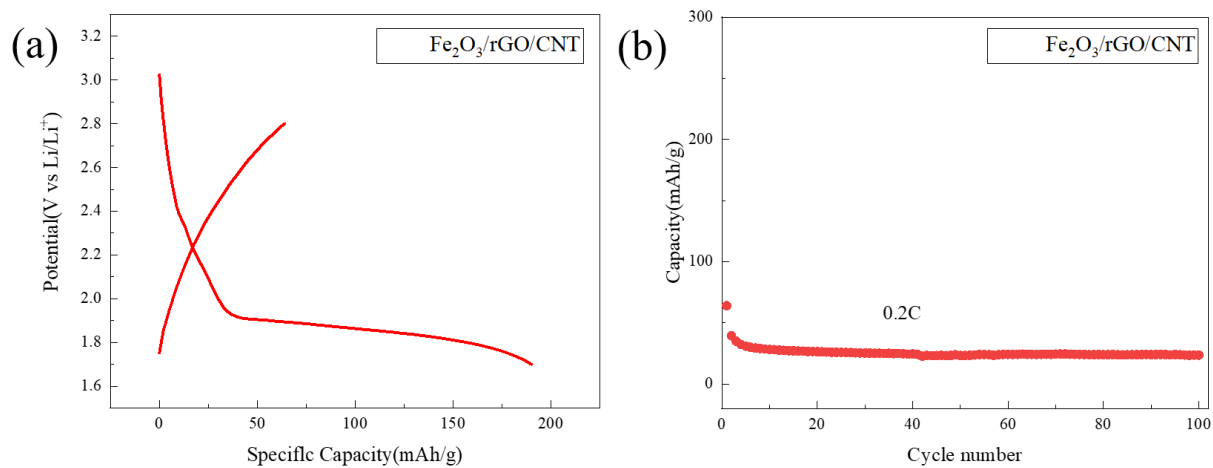

Fig. S2 The initial charge-discharge curves (a) and cycle performance (b) of

$\text{Fe}_2\text{O}_3/\text{rGO}/\text{CNT}$
